# Supplementary material for: Tailoring a hybrid three-component photoinitiating system for 3D printing
Source: Royal Society of Chemistry journal article supplement (doi:10.1039/d0cp03153d), 2020-01-01
Supplement: d0cp03153d1.pdf [file d0cp03153d1.pdf]

## Electronic Supplementary Information

### Tailoring hybrid three component photoinitiating system for 3D printing

C. Ley<sup>a\*</sup>, A. Ishak<sup>a</sup>, B. Metral<sup>a</sup>, J. Brendlé<sup>b</sup>, X. Allonas<sup>a</sup>

<sup>a</sup>LPIM, UHA, 3b rue A. Werner 68200 Mulhouse.

<sup>b</sup>IS2M, CNRS UMR 7361, 15 Rue Jean Starcky, 68057 Mulhouse.

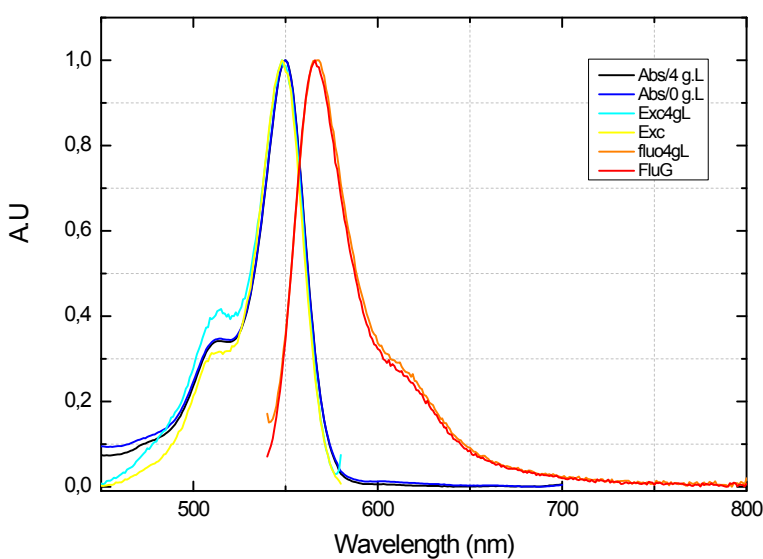

Figure ESI1: effect of clay concentration on the Optical properties of the anionic dye Rose Bengal.

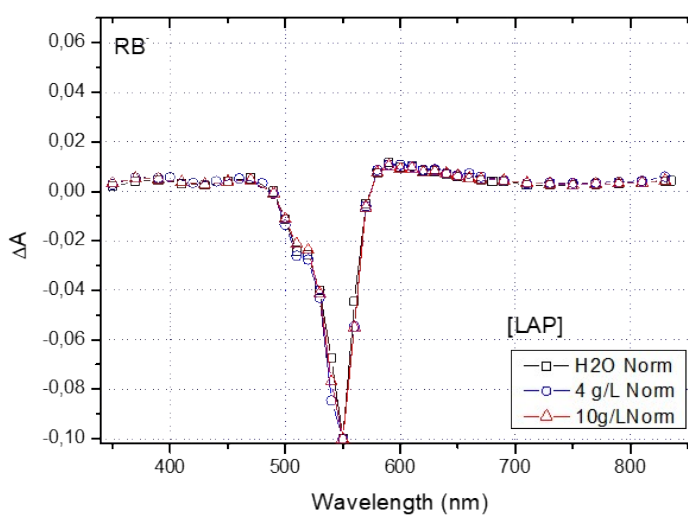

Figure ESI2: triplet excited state spectra of RB<sup>-</sup> as a function of clay concentration.

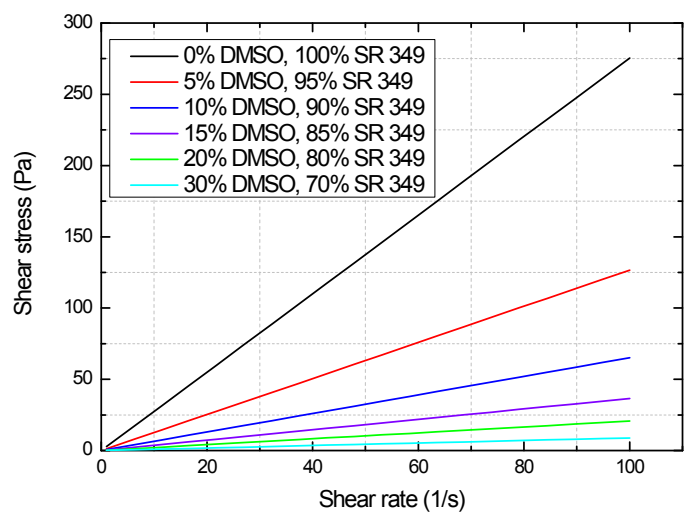

Figure ES13: Newtonian behaviour of the DMSO SR349 monomer solution.

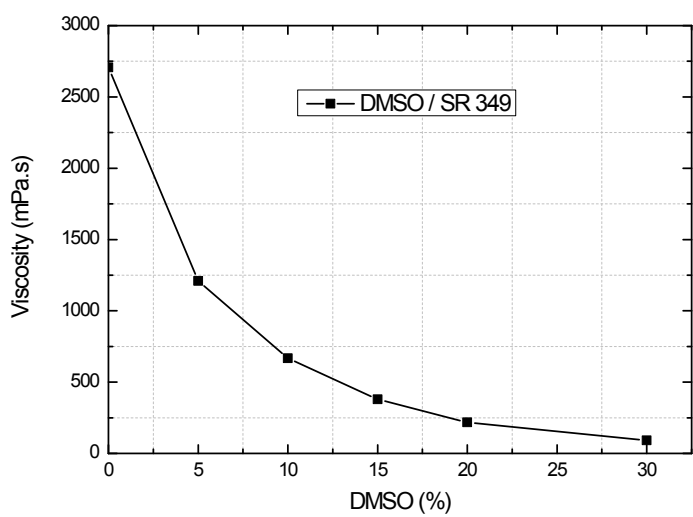

Figure ES14: Effect of DMSO content on the monomer viscosity.

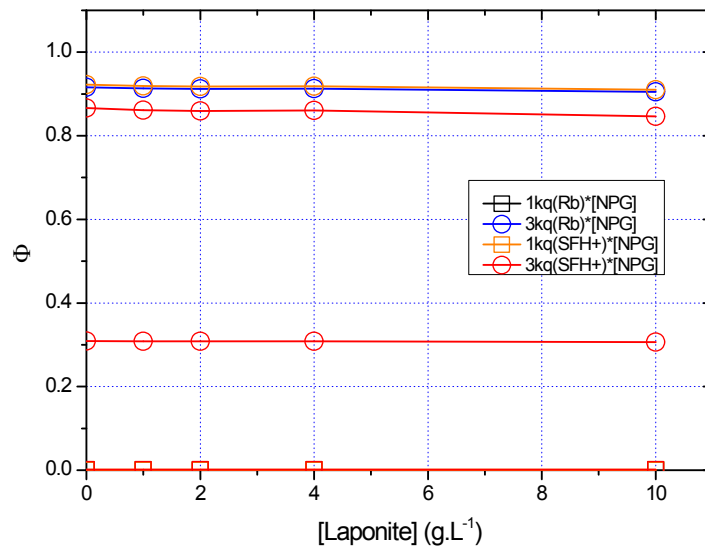

Figure ESI5: effect of clay concentration on the radical photogeneration efficiency at 10%wt DMS in monomer.

Table ESI 1: evolution of the resin viscosity as a function of [lap] at 10%wt DMSO content in the monomer

| [Lap](g.L <sup>-1</sup> ) | Viscosity [mPa·s] |
|---------------------------|-------------------|
| 0                         | 667               |
| 1                         | 697               |
| 2                         | 711               |
| 4                         | 704               |
| 10                        | 787               |

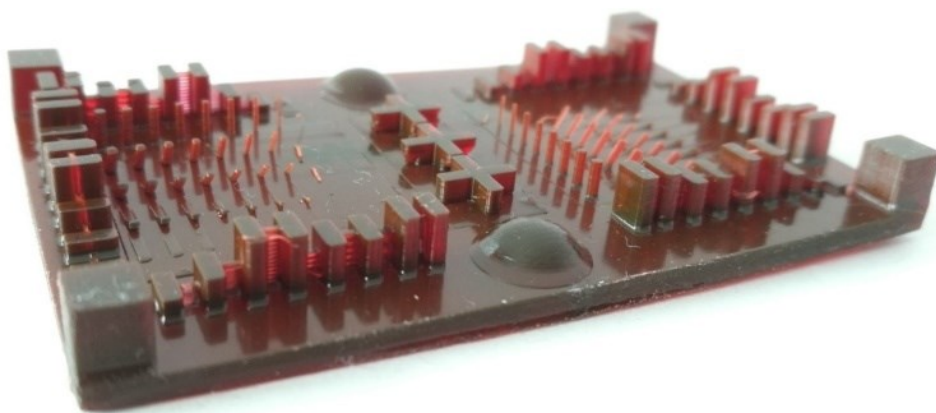

Figure ESI6: Resolution test piece obtained without Laponite®

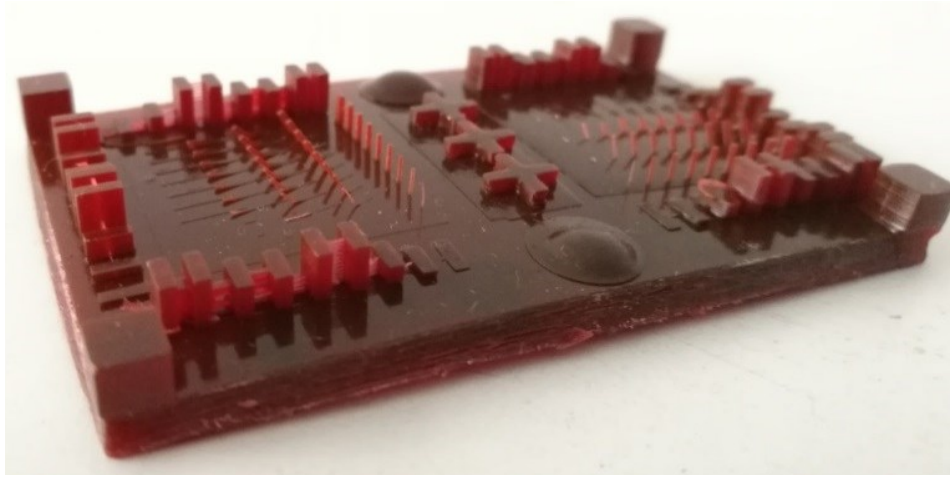

Figure ESI7: Resolution test piece obtained with  $1\text{g}\cdot\text{L}^{-1}$  clay.
